## Counteracting estimation bias and social influence to improve the wisdom of crowds

Albert B. Kao<sup>a,\*</sup>, Andrew M. Berdahl<sup>b</sup>, Andrew T. Hartnett<sup>c</sup>, Matthew J. Lutz<sup>d</sup>, Joseph B. Bak-Coleman<sup>e</sup>, Christos C. Ioannou<sup>f</sup>, Xingli Giam<sup>g</sup>, Iain D. Couzin<sup>d,h</sup>

<sup>a</sup>*Department of Organismic and Evolutionary Biology, Harvard University, Cambridge, MA, USA*

<sup>b</sup>*Santa Fe Institute, Santa Fe, NM, USA*

<sup>c</sup>*Argo AI, Pittsburgh, PA, USA*

<sup>d</sup>*Department of Collective Behaviour, Max Planck Institute for Ornithology, Konstanz, Germany*

<sup>e</sup>*Department of Ecology and Evolutionary Biology, Princeton University, Princeton, NJ, USA*

<sup>f</sup>*School of Biological Sciences, University of Bristol, Bristol, UK*

<sup>g</sup>*Department of Ecology and Evolutionary Biology, University of Tennessee, Knoxville, TN, USA*

<sup>h</sup>*Chair of Biodiversity and Collective Behaviour, Department of Biology, University of Konstanz, Konstanz, Germany*

---

### Abstract

Aggregating multiple non-expert opinions into a collective estimate can improve accuracy across many contexts. However, two sources of error can diminish collective wisdom: individual estimation biases and information sharing between individuals. Here we measure individual biases and social influence rules in multiple experiments involving hundreds of individuals performing a classic numerosity estimation task. We first investigate how existing aggregation methods, such as calculating the arithmetic mean or the median, are influenced by these sources of error. We show that the mean tends to overestimate, and the median underestimate, the true value for a wide range of numerosities. Quantifying estimation bias, and mapping individual bias to collective bias, allows us to develop and validate three new aggregation measures that effectively counter sources of collective estimation error. In addition, we present results from a further experiment that quantifies the social influence rules that individuals employ when incorporating personal estimates with social information. We show that the corrected mean is remarkably robust to social influence, retaining high accuracy in the presence or absence of social influence, across numerosities, and across different methods for averaging social information. Utilizing knowledge of estimation biases and social influence rules may therefore be an inexpensive and general strategy to improve the wisdom of crowds.

*Keywords:* wisdom of crowds, collective intelligence, social influence, estimation bias, numerosity

---

\* Author for correspondence: Albert B. Kao, e-mail: [albert.kao@gmail.com](mailto:albert.kao@gmail.com)

---

## 1 1. Introduction

2 The proliferation of online social platforms has enabled the rapid expression of opinions on  
3 topics as diverse as the outcome of political elections, policy decisions, or the future performance  
4 of financial markets. Because non-experts contribute the majority of these opinions, they may  
5 be expected to have low predictive power. However, it has been shown empirically that by  
6 aggregating these non-expert opinions, usually by taking the arithmetic mean or the median of  
7 the set of estimates, the resulting ‘collective’ estimate can be highly accurate [1–6]. Experiments  
8 with non-human animals have demonstrated similar results [7–13], suggesting that aggregating  
9 diverse estimates can be a simple strategy for improving estimation accuracy across contexts  
10 and even species.

11 Theoretical explanations for this ‘wisdom of crowds’ typically invoke the law of large num-  
12 bers [1, 14, 15]. If individual estimation errors are unbiased and center at the true value, then  
13 averaging the estimates of many individuals will increasingly converge on the true value. How-  
14 ever, empirical studies of individual human decision-making readily contradict this theoretical  
15 assumption. A wide variety of cognitive and perceptual biases have been documented in which  
16 humans seemingly deviate from rational behavior [16–18]. Empirical ‘laws’ such as Stevens’  
17 power law [19] have described the non-linear relationship between the subjective perception,  
18 and actual magnitude, of a physical stimulus. Such nonlinearities can lead to a systematic  
19 under- or over-estimation of a stimulus, as is frequently observed in numerosity estimation tasks  
20 [20–23]. Furthermore, the Weber-Fechner law [24] implies that log-normal, rather than normal,  
21 distributions of estimates are common. When such biased individual estimates are aggregated,  
22 the resulting collective estimate may also be biased, although the mapping between individual  
23 and collective biases is not well understood.

24 Sir Francis Galton was one of the first to consider the effect of biased opinions on the  
25 accuracy of collective estimates. He preferred the median over the arithmetic mean, arguing  
26 that the latter measure “give[s] a voting power to ‘cranks’ in proportion to their crankiness”  
27 [25]. However, if individuals are prone to under- or over-estimation in a particular task, then  
28 the median will also under- or over-estimate the true value. Other aggregation measures have  
29 been proposed to improve the accuracy of the collective estimate, such as the geometric mean  
30 [26], the average of the arithmetic mean and median [27], and the ‘trimmed mean’ (where the

31 tails of a distribution of estimates are trimmed and then the arithmetic mean is calculated from  
32 the truncated distribution) [28]. Although these measures may empirically improve accuracy in  
33 some cases, they tend not to address directly the root cause of collective error (*i.e.*, estimation  
34 bias). Therefore, it is not well understood how they generalize to other contexts and how close  
35 they are to the optimal aggregation strategy.

36 Many (though not all) models of the wisdom of crowds also assume that opinions are gener-  
37 ated independently of one another, which tends to maximize the information contained within  
38 the set of opinions [1, 14, 15]. But in real world contexts, it is more common for individuals to  
39 share information with, and influence, one another [26, 29]. In such cases, the individual esti-  
40 mates used to calculate a collective estimate will be correlated to some degree. Social influence  
41 can not only shrink the distribution of estimates [26] but may also systematically shift the distri-  
42 bution, depending on the rules that individuals follow when updating their personal estimate in  
43 response to available social information. For example, if individuals with extreme opinions are  
44 more resistant to social influence, then the distribution of estimates will tend to shift towards  
45 these opinions, leading to changes in the collective estimate as individuals share information  
46 with each other. In short, social influence may induce estimation bias, even if individuals in  
47 isolation are unbiased.

48 Quantifying how both individual estimation biases and social influence affect collective esti-  
49 mation is therefore crucial to optimizing, and understanding the limits of, the wisdom of crowds.  
50 Such an understanding would help to identify which of the existing aggregation measures should  
51 lead to the highest accuracy. It could also permit the design of novel aggregation measures that  
52 counteract these major sources of error, potentially improving both the accuracy and robustness  
53 of the wisdom of crowds beyond that allowed by existing measures.

54 Here, we collected five new datasets, and analyzed eight existing datasets from the literature,  
55 to characterize individual estimation bias in a well-known wisdom of crowds task, the ‘jellybean  
56 jar’ estimation problem. In this task, individuals in isolation simply estimate the number of  
57 objects (such as jellybeans, gumballs, or beads) in a jar [5, 6, 30, 31] (see Methods for details). We  
58 then performed an experiment manipulating social information to quantify the social influence  
59 rules that individuals use during this estimation task (Methods). We used these results to  
60 quantify the accuracy of a variety of aggregation measures, and identified new aggregation  
61 measures to improve collective accuracy in the presence of individual bias and social influence.

## 62 2. Methods

### 63 2.1. Numerosity estimation

64 For the five datasets that we collected, we recruited members of the community in Princeton,  
65 NJ, USA on April 26–28 and May 1, 2012, and in Santa Fe, NM, USA on October 17–20, 2016.  
66 Each participant was presented with one jar containing one of the following numbers of objects:  
67 54 ( $n = 36$ ), 139 ( $n = 51$ ), 659 ( $n = 602$ ), 5897 ( $n = 69$ ), or 27852 ( $n = 54$ ) (see Figure 1a for a  
68 representative photograph of the kind of object and jar used for the three smallest numerosities,  
69 and Figure S1 for a representative photograph of the kind of object and jar used for the largest  
70 two numerosities.). To motivate accurate estimates, the participants were informed that the  
71 estimate closest to the true value for each jar would earn a monetary prize. The participants  
72 then estimated the number of objects in the jar. No time limit was set, and participants were  
73 advised not to communicate with each other after completing the task.

74 Eight additional datasets were included for comparative purposes and were obtained from  
75 refs. [5, 6, 30, 31]. Details of statistical analyses and simulations performed on the collected  
76 datasets are provided in the electronic supplementary material.

### 77 2.2. Social influence experiment

78 For the experiments run in Princeton (number of objects  $J = 659$ ), we additionally tested  
79 the social influence rules that individuals use. The participants first recorded their initial es-  
80 timate,  $G_1$ . Next, participants were given ‘social’ information, in which they were told that  
81  $N = \{1, 2, 5, 10, 50, 100\}$  previous participants’ estimates were randomly selected and that the  
82 ‘average’ of these guesses,  $S$ , was displayed on a computer screen. Unbeknownst to the partici-  
83 pant, this social information was artificially generated by the computer, allowing us to control,  
84 and thus decouple, the perceived social group size and social distance relative to the partici-  
85 pant’s initial guess. Half of the participants were randomly assigned to receive social information  
86 drawn from a uniform distribution from  $G_1/2$  to  $G_1$ , and the other half received social informa-  
87 tion drawn from a uniform distribution from  $G_1$  to  $2G_1$ . Participants were then given the option  
88 to revise their initial guess by making a second estimate,  $G_2$ , based on their personal estimate  
89 and the perceived social information that they were given. Participants were informed that only  
90 the second guess would count toward winning a monetary prize. We therefore controlled the

91 social group size by varying  $N$  and controlled the social distance independently of the partic-  
92 ipant's accuracy by choosing  $S$  from  $G_1/2$  to  $2G_1$ . Details of the social influence model and  
93 simulations performed on these data are provided in the electronic supplementary material.

### 94 *2.3. Designing 'corrected' aggregation measures*

95 For a log-normal distribution, the expected value of the mean is given by  $X_{\text{mean}} = \exp(\mu + \sigma^2/2)$   
96 and the expected value of the median is  $X_{\text{median}} = \exp(\mu)$ , where  $\mu$  and  $\sigma$  are the two param-  
97 eters describing the distribution. Our empirical measurements of estimation bias resulted in the  
98 best-fit relationships  $\mu = m_\mu \ln(J) + b_\mu$  and  $\sigma = m_\sigma \ln(J) + b_\sigma$  (Figure 1c-d). We replace  $\mu$  and  
99  $\sigma$  in the first two equations with the best-fit relationships, and then solve for  $J$ , which becomes  
100 our new, 'corrected', estimate of the true value. This results in a 'corrected' arithmetic mean:

$$X_{\text{mean}}^C = \exp\left(\left(\sqrt{2m_\sigma^2(\ln X_{\text{mean}} - b_\mu) + 2m_\mu^2\left(\frac{1}{2} + \frac{m_\sigma b_\sigma}{m_\mu}\right)} - (m_\sigma b_\sigma + m_\mu)\right)/m_\sigma^2\right)$$

101 and a 'corrected' median:

$$X_{\text{median}}^C = \exp((\ln X_{\text{median}} - b_\mu)/m_\mu)$$

102 This procedure can be readily adapted for other estimation tasks, distributions of estimates,  
103 and estimation biases.

### 104 *2.4. A maximum-likelihood aggregation measure*

105 For this aggregation measure, the full set of estimates is used to form a new collective  
106 estimate, rather than just an aggregation measure such as the mean or the median to generate  
107 a corrected measure. We again invoke the best-fit relationships in Figure 1c-d, which imply  
108 that, for a given actual number of objects  $J$ , we expect a log-normal distribution described by  
109 parameters  $\mu = m_\mu \ln(J) + b_\mu$  and  $\sigma = m_\sigma \ln(J) + b_\sigma$ . We therefore scan across values of  $J$  and  
110 calculate the likelihood that each associated log-normal distribution generated the given set of  
111 estimates. The numerosity that maximizes this likelihood becomes the collective estimate of the  
112 true value.

## 113 **3. Results**

### 114 *3.1. Quantifying estimation bias*

115 To uncover individual biases in estimation tasks, we first sought to characterize how the dis-  
116 tribution of individual estimates changes as a function of the true number of objects  $J$  (Figure

117 1a). We performed experiments across a  $>500$ -fold range of numerosities, from 54 to 27852 ob-  
118 jects, with a total of 812 people sampled across the experiments. For all numerosities tested, an  
119 approximately log-normal distribution was observed (see Figure 1b for a histogram of an exam-  
120 ple dataset, Figure S2 for histograms of all other datasets, and Figure S3 for a comparison of the  
121 datasets to log-normal distributions). Log-normal distributions can be described by two param-  
122 eters,  $\mu$  and  $\sigma$ , which correspond to the arithmetic mean and standard deviation, respectively, of  
123 the normal distribution that results when the original estimates are log-transformed (Figure 1b,  
124 inset, and section 1 of the electronic supplementary material on how the maximum-likelihood  
125 estimates of  $\mu$  and  $\sigma$  were computed for each dataset).

126 We found that the shape of the log-normal distribution changes in a predictable manner  
127 as the numerosity changes. In particular, the two parameters of the log-normal distribution,  $\mu$   
128 and  $\sigma$ , both exhibit a linear relationship with the logarithm of the number of objects in the jar  
129 (Figure 1c-d). These relationships hold across the entire range of numerosities that we tested  
130 (which spans nearly three orders of magnitude). That the parameters of the distribution co-vary  
131 closely with numerosity allows us to directly compute how the magnitude of various aggregation  
132 measures changes with numerosity, and provides us with information about human estimation  
133 behavior which we can exploit to improve the accuracy of the aggregation measures.

### 134 3.2. *Expected error of aggregation measures*

135 We used the maximum-likelihood relationships shown in Figure 1c-d to first compute the  
136 expected value of the arithmetic mean, given by  $\exp(\mu + \sigma^2/2)$ , and the median, given by  
137  $\exp(\mu)$ , of the log-normal distribution of estimates, across the range of numerosities that we  
138 tested empirically (between 54 and 27852 objects). We then compared the magnitude of these  
139 two aggregation measures to the true value to identify any systematic biases in these measures  
140 (we note that any aggregation measure may be examined in this way, but for clarity here we  
141 display just the two most commonly used measures).

142 Overall, across the range of numerosities tested, we found that the arithmetic mean tended  
143 to overestimate, while the median tended to underestimate, the true value (Figure 2a). This is  
144 corroborated by our empirical data: for four out of the five datasets, the mean overestimated  
145 the true value, while the median underestimated the true value in four of five datasets (Figure  
146 2a). We note that our model predicts qualitatively different patterns for very small numerosities  
147 (outside of the range that we tested experimentally). Specifically, in this regime the model

148 predicts that the mean and the median both overestimate the true value, with large relative  
149 errors for both measures. However, we expect humans to behave differently when presented  
150 with a small number of objects that can be counted directly compared to a large number of  
151 objects that could not be easily counted; therefore, we avoid extrapolating our results and apply  
152 our model only to the range that we tested experimentally (spanning nearly three orders of  
153 magnitude).

154 That the median tends to underestimate the true value implies that the majority of in-  
155 dividuals underestimate the true numerosity. This conforms with the results of other studies  
156 demonstrating an underestimation bias in numerosity estimation in humans (*e.g.*, [21–23, 32]).  
157 Despite this, the arithmetic mean tends to overestimate the true value because the log-normal  
158 distribution has a long tail (Figure 1b), which inflates the mean. Indeed, because the parameter  
159  $\sigma$  increases with numerosity, the dispersion of the distribution is expected to increase dispropo-  
160 rtionally quickly with numerosity, such that the coefficient of variation (the ratio between the  
161 standard deviation and the mean of the untransformed estimates) increases with numerosity  
162 (Figure S4). This finding differs from other results showing a constant coefficient of variation  
163 across numerosities [20, 21]. This contrasting result may be explained by the larger-than-typical  
164 range of numerosities that we evaluated here (with respect to previous studies), which improves  
165 our ability to detect a trend in the coefficient of variation. Alternatively (and not mutually  
166 exclusively), it may result from other studies displaying many numerosities to the same partici-  
167 pant, which may cause correlations in a participant’s estimates [21, 22] and reduce variation. By  
168 contrast, we only showed a single jar to each participant in our estimation experiments. Overall,  
169 the degree of underestimation and overestimation of the median and mean, respectively, was  
170 approximately equal across the range of numerosities tested, and we did not detect consistent  
171 differences in accuracy between these two aggregation measures (Figure 2b).

### 172 *3.3. Designing and testing aggregation measures that counteract estimation bias*

173 Knowing the expected error of the aggregation measures relative to the true value, we can  
174 design new measures to counter this source of collective estimation error. Using this methodol-  
175 ogy, we specify functional forms of the ‘corrected’ arithmetic mean and the ‘corrected’ median  
176 (Methods). In addition to these two adjusted measures, we propose a maximum-likelihood  
177 method that uses the full set of estimates, rather than just the mean or median, to locate the  
178 numerosity that is most likely to have produced those estimates (Methods). Although applied

179 here to the case of log-normal distributions and particular relationships between numerosity and  
180 the parameters of the distributions, our procedure is general and could be used to construct  
181 specific corrected measures appropriate for other distributions and relationships, subsequent to  
182 empirically characterizing these patterns.

183 Once the corrected measures have been parameterized for a specific context, they can be  
184 applied to a new test dataset to produce an improved collective estimate from that data. How-  
185 ever, the three new measures are predicted to have near-zero error only in their expected values,  
186 which assumes an infinitely large test dataset (and that the corrected measures have been accu-  
187 rately parameterized). A finite-sized set of estimates, on the other hand, will generally exhibit  
188 some deviation from the expected value. It is possible that the measures will produce differ-  
189 ent noise distributions around the expected value, which will affect their real-world accuracy.  
190 To address this, we measured the overall accuracy of the aggregation measures across a wide  
191 range of test sample sizes and numerosities, simulating datasets by drawing samples using the  
192 maximum-likelihood fits shown in Figure 1c-d. We also conducted a separate analysis, in which  
193 we generate test datasets by drawing samples directly from our experimental data, the results  
194 of which we include in the electronic supplementary material (see section 2 of the electronic  
195 supplementary material for details on both methodologies and for justification of why we chose  
196 to include the results from the simulated data in the main text.)

197 We compared each of the new aggregation measures to the arithmetic mean, the median,  
198 and three other ‘standard’ measures that have been described previously in the literature: the  
199 geometric mean, the average of the mean and the median, and a trimmed mean (where we remove  
200 the smallest 10% of the data, and the largest 10% of the data, before computing the arithmetic  
201 mean), in pairwise fashion, calculating the fraction of simulations in which one measure had  
202 lower error than the other.

203 All three new aggregation measures outperformed all of the other measures (Figure 3a,  
204 left five columns), displaying lower error in 58–78% of simulations. Comparing the three new  
205 measures against each other, the maximum-likelihood measure performed best, followed by the  
206 corrected mean, while the corrected median resulted in the lowest overall accuracy (Figure 3a,  
207 right three columns). The 95% confidence intervals of the percentages are, at most,  $\pm 1\%$  of the  
208 stated percentages (binomial test,  $n = 10000$ ), and therefore the results shown in Figure 3a are  
209 all significantly different from chance. The results from our alternate analysis, using samples



210 drawn from our experimental data, are broadly similar, albeit somewhat weaker, than those using  
211 simulated data: the corrected median and maximum-likelihood measures still outperformed all  
212 of the five standard measures, while the corrected mean outperformed three out of the five  
213 standard measures (Figure S5a).

214 While the above analysis suggests that the new aggregation measures may be more accurate  
215 than many standard measures over a wide range of conditions, it relied on over 800 estimates  
216 to parameterize the individual estimation biases. Such an investment to characterize estimation  
217 biases may be unfeasible for many applications, so we asked how large of a training dataset is  
218 necessary in order to observe improvements in accuracy over the standard measures. To study  
219 this, we obtained a given number of estimates from across the range of numerosities, generated  
220 a maximum-likelihood regression on that training set, then used that to predict the numerosity  
221 of a separate test dataset. As with the previous analysis, we generated the training and test  
222 datasets by drawing samples using the maximum-likelihood fits shown in Figure 1c-d, but also  
223 conducted a parallel analysis whereby we generated training and test datasets by drawing from  
224 our experimental data (section 3 of the electronic supplementary material for details of both  
225 methodologies).

226 We found rapid improvements in accuracy as the size of the training dataset increased (Figure  
227 3b). In our simulations, the maximum-likelihood measure begins to outperform the median and  
228 geometric mean when the size of the training dataset is at least 20 samples, the arithmetic  
229 mean and trimmed mean after 55 samples, and the average of the mean and median after 80  
230 samples. The corrected mean required at least 105 samples, while the corrected median required  
231 at least 175 samples, to outperform the five standard measures. Using samples drawn from our  
232 experimental data, our three measures required approximately 200 samples to outperform the  
233 five standard measures (Figure S5b). In short, while our method of correcting biases requires  
234 parameterizing bias across the entire range of numerosities of interest, our simulations show  
235 that much fewer training samples is sufficient for our new aggregation measures to exhibit an  
236 accuracy higher than standard aggregation measures.

237 We next investigated precisely how the size of the test dataset affects accuracy. We defined  
238 an ‘error tolerance’ as the maximum acceptable error of an aggregation measure and asked what  
239 is the probability that a measure achieves a given tolerance for a particular experiment (the  
240 ‘tolerance probability’). As before, we generate test samples by drawing from the maximum-

241 likelihood fits but also perform an analysis drawing from our experimental data (see section 4 of  
242 the electronic supplementary material for both methodologies). For all numerosities, the three  
243 new aggregation measures tended to outperform the five standard measures if the size of the test  
244 dataset is relatively large (Figure 4b-c, Figures S6-S7). However, when the numerosity is large  
245 and the size of the test dataset is relatively small, we observed markedly different patterns. In  
246 this regime, the relative accuracy of aggregation measures can depend on the error tolerance.  
247 For example, for numerosity  $\ln(J) = 10$ , for small error tolerances ( $<0.4$ ), the geometric mean  
248 exhibited the lowest tolerance probability across all of the measures under consideration, but  
249 for large error tolerances ( $>0.75$ ), it is the most likely to fall within tolerance (Figure 4a).  
250 This means that if a researcher wants the collective estimate to be within 40% of the true  
251 value (error tolerance of 0.4), then the geometric mean would be the worst choice for small test  
252 datasets at large numerosities, but if the tolerance was instead set to 75% of the true value,  
253 then the geometric mean would be the best out of all of the measures. These patterns were  
254 also broadly reflected in our analysis using samples drawn from our experimental data (Figures  
255 S8-S10). Therefore, while the corrected measures should have close to perfect accuracy at the  
256 limit of infinite sample size (and perform better than the standard measures overall), there exist  
257 particular regimes in which the standard measures may outperform the new measures.

### 258 *3.4. Quantifying the social influence rules*

259 We then conducted an experiment to quantify the social influence rules that individuals use  
260 to update their personal estimate by incorporating information about the estimates of other  
261 people (see Methods for details). Briefly, we first allowed participants to make an independent  
262 estimate. Then we generated artificial ‘social information’ by selecting a value that was a certain  
263 displacement from their first estimate (the ‘social displacement’), and informed the participants  
264 that this value was the result of averaging across a certain number of previous estimates (the  
265 ‘social group size’). We gave the participants the opportunity to revise their estimate, and  
266 we measured how their change in estimate was affected by the social displacement and social  
267 group size. By using artificial information and masquerading it as real social information, unlike  
268 previous studies, we were able to decouple the effect of social group size, social displacement,  
269 and the accuracy of the initial estimate.

270 We found that a fraction of participants (231 out of 602 participants) completely discounted  
271 the social information, meaning that their second estimate was identical to their first. We

272 constructed a two-stage hurdle model to describe the social influence rules by first modeling  
273 the probability that a participant utilized or discarded social information, then, for the 371  
274 participants who did utilize social information, we modeled the magnitude of the effect of social  
275 information.

276 A Bayesian approach to fitting a logistic regression model was used to infer whether social  
277 displacement (defined as  $(S - G_1)/G_1$ , where  $S$  is the social estimate and  $G_1$  is the participant's  
278 initial estimate), social distance (the absolute value of social displacement), or social group size  
279 affected the probability that a participant ignored, or used, social information (see section 5 of  
280 the electronic supplementary material for details). Because social distance is a function of social  
281 displacement, we did not make inferences about these two variables separately based on their  
282 respective credible intervals (coefficient [95% CI]: 0.22 [0.03,0.40] for social displacement and  
283 0.061 [-0.12, 0.24] for social distance). Instead, we graphically interpreted how these two variables  
284 jointly affect the probability of changing one's estimate in response to social information, and  
285 overall we found that numerically larger social estimates increased the probability of changing  
286 one's guess, but numerically smaller social estimates decreased that effect (Figure 5a). The  
287 probability of using social information did not depend credibly on social group size (-0.045 [-  
288 0.18, 0.094]) (Figure 5b). Posterior predictive checks were used to verify the model captured  
289 statistical features of the data (Figure S12); see Figure S11a for the posterior distributions.

290 We next modeled the magnitude of the change in estimate, out of the participants who  
291 did utilize social information. Following [33], we defined a measure of the strength of social  
292 influence,  $\alpha$ , by considering the logarithm of the participant's revised estimate,  $\ln(G_2)$ , as a  
293 weighted average of the logarithm of the perceived social information,  $\ln(S)$ , and the logarithm  
294 of the participant's initial estimate  $\ln(G_1)$ , such that  $\ln(G_2) = \alpha \ln(S) + (1 - \alpha) \ln(G_1)$ . Here,  
295  $\alpha = 0$  indicates that the participant's two estimates were identical, and therefore the individual  
296 was not influenced by social information at all, while  $\alpha = 1$  means the participant's second  
297 estimate mirrors the social information. We again used Bayesian techniques to estimate  $\alpha$  as  
298 a normally distributed, logistically transformed linear function of social displacement, social  
299 distance, and group size (see section 5 of the electronic supplementary material for details).

300 Graphically, we found that the social influence weight decreases as the social information is  
301 increasingly smaller than the initial estimate but little effect for social information larger than  
302 the initial estimate (coeff. [95% CI]: 0.65 [0.28, 1.07] for social displacement and -0.41 [-0.82,

303 -0.0052] for social distance) (Figure 5c). The social influence weight credibly increases with  
304 social group size (0.37 [0.17, 0.58]) (Figure 5d). Again, posterior predictive checks revealed that  
305 the model generated an overall distribution of social weights consistent with what was found in  
306 the data (Figure S13); see Figure 11b for the posterior distributions.

### 307 *3.5. The effect of social influence on the wisdom of crowds*

308 If individuals share information with each other before their opinions are aggregated, then  
309 the independent, log-normal distribution of estimates will be altered. Since individuals take a  
310 form of weighted average of their own estimate and perceived social information, the distribution  
311 of estimates should converge towards intermediate values. However, it is not clear what effect  
312 the observed social influence rules have on the value, or accuracy, of the aggregation measures  
313 [34]. In particular, since the new aggregation measures introduced here were parameterized  
314 on independent estimates unaltered by social influence, their performance may degrade when  
315 individuals share information with each other.

316 We simulated several rounds of influence using the rules that we uncovered, using a fully  
317 connected social network (each individual was connected all other individuals), in order to  
318 identify measures that may be relatively robust to social influence (see section 6 of the electronic  
319 supplementary material). We used two alternate assumptions about how a set of estimates is  
320 averaged, either by the individual or by an external agent, before being presented as social  
321 information (the ‘individual aggregation measure’), using either the geometric mean or the  
322 arithmetic mean (see section 7 of the electronic supplementary material). While the maximum-  
323 likelihood measure generally performed the best in the absence of social influence (Figure 3), this  
324 measure was highly susceptible to the effects of social influence, particularly at large numerosities  
325 (Figure 6). By contrast, the corrected mean was remarkably robust to social influence, across  
326 numerosities, and for both individual aggregation measures, while exhibiting nearly the same  
327 accuracy as the maximum-likelihood measure in the absence of social influence.

## 328 **4. Discussion**

329 While the wisdom of crowds has been documented in many human and non-human contexts,  
330 the limits of its accuracy are still not well understood. Here we demonstrated how, why, and  
331 when collective wisdom may break down by characterizing two major sources of error, individual

332 (estimation bias) and social (information sharing). We revealed the limitations of some of  
333 the most common averaging measures and introduced three novel measures that leverage our  
334 understanding of these sources of error to improve the wisdom of crowds.

335 In addition to the conclusions and recommendations drawn for numerosity estimation, the  
336 methods described here could be applied to a wide range of estimation tasks. Estimation biases  
337 and social influence are ubiquitous, and estimation tasks may cluster into broad classes that  
338 are prone to similar biases or social rules [35]. For example, the distribution of estimates for  
339 many tasks are likely to be log-normal in nature [36], while others may tend to be normally  
340 distributed. Indeed, there is evidence that counteracting estimation biases can be a successful  
341 strategy to improve estimates of probabilities [37–39], city populations [40], movie box office  
342 returns [40], and engineering failure rates [41].

343 Furthermore, the social influence rules that we identified empirically are similar to general  
344 models of social influence, with the exception of the effect of the social displacement that we  
345 uncovered. This asymmetric effect suggests that a focal individual was more strongly affected by  
346 social information that was larger in value relative to the focal individual’s estimate compared  
347 to social information that was smaller than the individual’s estimate. The observed increase  
348 in the coefficient of variation as numerosity increased (Figure S4b) may suggest that one’s  
349 confidence about one’s own estimate decreases as numerosity increases, which could lead to  
350 an asymmetric effect of social displacement. Other estimation contexts in which confidence  
351 scales with estimation magnitude could yield a similar effect. This effect was combined with a  
352 weaker negative effect of the social distance, which is reminiscent of ‘bounded confidence’ opinion  
353 dynamics models (*e.g.*, [42–44]), whereby individuals weigh more strongly social information  
354 that is similar to their own opinion. By carefully characterizing both the *individual* estimation  
355 biases and *collective* biases generated by social information sharing, our approach allows us to  
356 counteract such biases, potentially yielding significant improvements when aggregating opinions  
357 across other domains.

358 Other approaches have been used to improve the accuracy of crowds. One strategy is to  
359 search for ‘hidden experts’ and weigh these opinions more strongly [3, 33, 45–48]. While this  
360 can be effective in certain contexts, we did not find evidence of hidden experts in our data.  
361 Comparing the group of individuals who ignored social information and those who utilized social  
362 information, the two distribution of estimations were not significantly different ( $P = 0.938$ ,

363 Welch's t-test on the log-transformed estimates), and the arithmetic mean, the median, nor  
364 our three new aggregation measures were significantly more accurate across the two groups  
365 (Figure S14). Furthermore, searching for hidden experts requires additional information about  
366 the individuals (such as propensity to use social information, past performance, or confidence  
367 level). Our method does not require any additional information about each individual, only  
368 knowledge about statistical tendencies of the population at large (and relatively few samples  
369 may be needed to sufficiently parameterize these tendencies).

370 Further refinement of our methods is possible. In cases where the underlying social network  
371 is known [49, 50], or where individuals vary in power or influence [51], simulation of social  
372 influence rules on these networks could lead to a more nuanced understanding of the mapping  
373 between individual to collective estimates. In addition, aggregation measures can be generalized  
374 in a straightforward manner to calculate confidence intervals, in which an estimate range is  
375 generated that includes the true value with some probability. To improve the accuracy of  
376 confidence intervals, information about the sample size and other features that we showed to be  
377 important can be included.

378 In summary, counteracting estimation biases and social influence may be a simple, general,  
379 and computationally efficient strategy to improve the wisdom of crowds.

## 380 **5. Competing interests**

381 We have no competing interests.

## 382 **6. Author Contributions**

383 ABK, AB, and IDC designed the experiments. ABK, AB, ATH, and MJL performed the  
384 experiments. ABK, AB, JB-C, CCI, and XG analyzed the data. ABK, AB, and IDC wrote the  
385 paper.

## 386 **7. Acknowledgements**

387 We thank Stefan Krause, Jens Krause, Andrew King, and Michael J. Mauboussin for con-  
388 tributing datasets to this study, and Mirta Galesic for providing feedback on the manuscript.

389 **8. Data Accessibility**

390 Datasets are available in the electronic supplementary material.

391 **9. Ethics**

392 The experimental procedures were approved by the Princeton University and Santa Fe In-  
393 stitute ethics committees.

394 **10. Funding Statement**

395 ABK was supported by a James S. McDonnell Foundation Postdoctoral Fellowship Award  
396 in Studying Complex Systems. AB was supported by an SFI Omidyar Postdoctoral Fellowship  
397 and a grant from the Templeton Foundation. CCI was supported by a NERC Independent  
398 Research Fellowship NE/K009370/1. IDC acknowledges support from NSF (PHY-0848755, IOS-  
399 1355061, EAGER-IOS-1251585), ONR (N00014-09-1-1074, N00014-14-1-0635), ARO (W911NG-  
400 11-1-0385, W911NF-14-1-0431), and the Human Frontier Science Program (RGP0065/2012).

- 401 [1] J. Surowiecki, *The Wisdom of the Crowds: Why the Many are Smarter than the Few*, Little  
402 Brown, 2004.
- 403 [2] F. Galton, *Vox populi*, *Nature* 75 (1907) 450–451.
- 404 [3] D. Prelec, H. Seung, J. McCoy, A solution to the single-question crowd wisdom problem,  
405 *Nature* 541 (2017) 532–535.
- 406 [4] B. Bahrami, K. Olsen, P. Latham, A. Roepstorff, G. Rees, C. Frith, Optimally interacting  
407 minds, *Science* 329 (2010) 1081–1085.
- 408 [5] S. Krause, R. James, J. Faria, G. Ruxton, J. Krause, Swarm intelligence in humans:  
409 diversity can trump ability, *Animal Behaviour* 81 (2011) 941–948.
- 410 [6] A. King, L. Cheng, S. Starke, J. Myatt, Is the true ‘wisdom of the crowd’ to copy successful  
411 individuals?, *Biology Letters* 8 (2011) 197–200.
- 412 [7] D. Sumpter, J. Krause, R. James, I. Couzin, A. Ward, Consensus decision making by fish,  
413 *Current Biology* 18 (2008) 1773–1777.
- 414 [8] A. Ward, J. Herbert-Read, D. Sumpter, J. Krause, Fast and accurate decisions through  
415 collective vigilance in fish shoals, *Proc Natl Acad Sci USA* 108 (2011) 2312–2315.
- 416 [9] A. Ward, D. Sumpter, I. Couzin, P. Hart, J. Krause, Quorum decision-making facilitates  
417 information transfer in fish shoals, *Proc Natl Acad Sci USA* 105 (2008) 6948–6953.
- 418 [10] C. C. Ioannou, Swarm intelligence in fish? the difficulty in demonstrating distributed and  
419 self-organised collective intelligence in (some) animal groups, *Behavioural processes* 141  
420 (2017) 141–151.
- 421 [11] T. Sasaki, B. Granovskiy, R. Mann, D. Sumpter, S. Pratt, Ant colonies outperform indi-  
422 viduals when a sensory discrimination task is difficult but not when it is easy, *Proc Natl*  
423 *Acad Sci USA* 110 (2013) 13769–13773.
- 424 [12] T. Sasaki, S. Pratt, Emergence of group rationality from irrational individuals, *Behav Ecol*  
425 22 (2011) 276–281.
- 426 [13] S. Tamm, Bird orientation: single homing pigeons compared to small flocks, *Behav Ecol*  
427 *Sociobiol* 7 (1980) 319–322.



- 428 [14] A. Simons, Many wrongs: the advantage of group navigation, *Trends Ecol Evol* 19 (2004)  
429 453–455.
- 430 [15] N. Condorcet, *Essai sur l'application de l'analyse à la probabilité des décisions rendues à*  
431 *la pluralité de voix*, Paris, 1785.
- 432 [16] D. Kahneman, *Thinking, Fast and Slow*, Straus and Giroux, 2011.
- 433 [17] R. Nickerson, Confirmation bias: a ubiquitous phenomenon in many guises, *Review of*  
434 *General Psychology* 2 (1998) 175–220.
- 435 [18] M. Haselton, D. Nettle, The paranoid optimist: an integrative evolutionary model of  
436 cognitive biases, *Personality and Social Psychology Review* 10 (2006) 47–66.
- 437 [19] S. Stevens, On the psychophysical law, *The Psychological Review* 64 (1957) 153–181.
- 438 [20] J. Whalen, C. Gallistel, R. Gelman, Nonverbal counting in humans: the psychophysics of  
439 number representation, *Psychological Science* 10 (1999) 130–137.
- 440 [21] V. Izard, S. Dehaene, Calibrating the mental number line, *Cognition* 106 (2008) 1221–1247.
- 441 [22] L. E. Krueger, Single judgments of numerosity, *Attention, Perception, & Psychophysics* 31  
442 (1982) 175–182.
- 443 [23] L. E. Krueger, Perceived numerosity: A comparison of magnitude production, magni-  
444 tude estimation, and discrimination judgments, *Attention, Perception, & Psychophysics* 35  
445 (1984) 536–542.
- 446 [24] L. Krueger, Reconciling fechner and stevens: toward a unified psychophysical law, *Behav-*  
447 *ioral and Brain Sciences* 12 (1989) 251–320.
- 448 [25] F. Galton, One vote, one value, *Nature* 75 (1907) 414.
- 449 [26] J. Lorenz, H. Rauhut, F. Schweitzer, D. Helbing, How social influence can undermine the  
450 wisdom of crowd effect, *Proc Natl Acad Sci USA* 108 (2011) 9020–9025.
- 451 [27] M. Lobo, D. Yao, Human judgement is heavy tailed: Empirical evidence and implications  
452 for the aggregation of estimates and forecasts, Fontainebleau: INSEAD, 2010.

- 453 [28] J. Armstrong, Combining forecasts. Armstrong, JS, ed. Principles of Forecasting: A Hand-  
454 book for Researchers and Practitioners, Kluwer, New York, 2001.
- 455 [29] A. Kao, N. Miller, C. Torney, A. Hartnett, I. Couzin, Collective learning and optimal con-  
456 sensus decisions in social animal groups, PLoS Computational Biology 10 (2014) e1003762.
- 457 [30] C. Wagner, C. Schneider, S. Zhao, H. Chen, The wisdom of reluctant crowds, Proceedings  
458 of the 43rd Hawaii International Conference on System Sciences, 2010.
- 459 [31] M. Mauboussin, Explaining the wisdom of crowds, Legg Mason Capital Management White  
460 Paper, 2007.
- 461 [32] S. Kemp, Estimating the sizes of sports crowds, Perceptual and motor skills 59 (1984)  
462 723–729.
- 463 [33] G. Madirolas, G. de Polavieja, Improving collective estimations using resistance to social  
464 influence, PLoS Comput Biol 11 (2015) e1004594.
- 465 [34] B. Golub, M. Jackson, Naïve learning in social networks and the wisdom of crowds, Amer-  
466 ican Economic Journal: Microeconomics 2 (2010) 112–149.
- 467 [35] M. Steyvers, B. Miller, Cognition and collective intelligence, Handbook of Collective  
468 Intelligence (2015) 119.
- 469 [36] S. Dehaene, V. Izard, E. Spelke, P. Pica, Log or linear? distinct intuitions of the number  
470 scale in western and amazonian indigene cultures, Science 320 (2008) 1217–1220.
- 471 [37] B. M. Turner, M. Steyvers, E. C. Merkle, D. V. Budescu, T. S. Wallsten, Forecast aggrega-  
472 tion via recalibration, Machine learning 95 (2014) 261–289.
- 473 [38] M. D. Lee, I. Danileiko, Using cognitive models to combine probability estimates, Judgment  
474 and Decision Making 9 (2014) 259.
- 475 [39] V. A. Satopää, J. Baron, D. P. Foster, B. A. Mellers, P. E. Tetlock, L. H. Ungar, Com-  
476 bining multiple probability predictions using a simple logit model, International Journal of  
477 Forecasting 30 (2014) 344–356.
- 478 [40] A. Whalen, S. Yeung, Using ground truths to improve wisdom of the crowd estimates,  
479 Proceedings of the Annual Cognitive Science Society Meeting (2015).

- 480 [41] E. Merkle, M. Steyvers, A psychological model for aggregating judgments of magnitude,  
481 Social computing, behavioral-cultural modeling and prediction (2011) 236–243.
- 482 [42] R. Hegselmann, U. Krause, Opinion dynamics and bounded confidence models, analysis,  
483 and simulation, *J Artif Soc Soc Simulat* 5 (2002).
- 484 [43] G. Deffuant, D. Neau, F. Amblard, G. Weisbuch, Mixing beliefs among interacting agents,  
485 *Advances in Complex Systems* 3 (2000) 87–98.
- 486 [44] G. Deffuant, F. Amblard, G. Weisbuch, T. Faure, How can extremism prevail? a study  
487 based on the relative agreement interaction model, *Journal of artificial societies and social*  
488 *simulation* 5 (2002).
- 489 [45] A. Koriat, When are two heads better than one and why?, *Science* 336 (2012) 360–362.
- 490 [46] S. Hill, N. Ready-Campbell, Expert stock picker: the wisdom of (experts in) crowds,  
491 *International Journal of Electronic Commerce* 15 (2011) 73–102.
- 492 [47] J. Whitehill, T. Wu, J. Bergsma, J. Movellan, P. Ruvolo, Whose vote should count more:  
493 optimal integration of labels from labelers of unknown expertise, *Advances in Neural In-*  
494 *formation Processing Systems* 22 (2009) 2035–2043.
- 495 [48] D. V. Budescu, E. Chen, Identifying expertise to extract the wisdom of crowds, *Management*  
496 *Science* 61 (2014) 267–280.
- 497 [49] M. Jönsson, U. Hahn, E. Olsson, The kind of group you want to belong to: Effects of group  
498 structure on group accuracy, *Cognition* 142 (2015) 191–204.
- 499 [50] M. Moussaïd, S. Herzog, J. Kämmer, R. Hertwig, Reach and speed of judgment propagation  
500 in the laboratory, *Proc Natl Acad Sci USA* 114 (2017) 4117–4122.
- 501 [51] J. Becker, D. Brackbill, D. Centola, Network dynamics of social influence in the wisdom of  
502 crowds, *Proc Natl Acad Sci USA* 114 (2017) E5070–E5076.

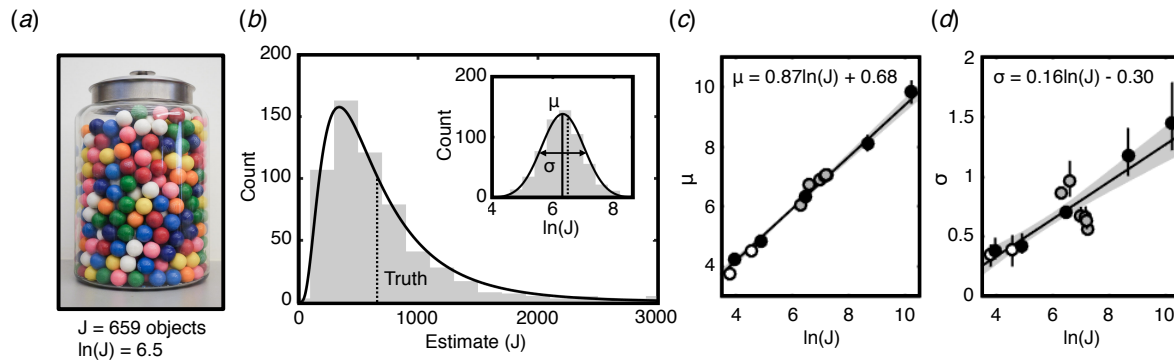

Figure 1: **The effect of numerosity on the distribution of estimates.** (a) An example jar containing 659 objects ( $\ln(J) = 6.5$ ). (b) The histogram of estimates (grey bars) resulting from the jar shown in (a) closely approximates a log-normal distribution (solid black line); dotted vertical line indicates the true number of objects. A log-normal distribution is described by two parameters,  $\mu$  and  $\sigma$ , which are the mean and standard deviation, respectively, of the normal distribution that results when the logarithm of the estimates is taken (inset). (c-d) The two parameters  $\mu$  and  $\sigma$  increase linearly with the logarithm of the true number of objects,  $\ln(J)$ . Solid lines: maximum-likelihood estimate, shaded area: 95% confidence interval. The maximum-likelihood estimate was calculated using only the five original datasets collected for this study (black circles); the eight other datasets collected from the literature are shown only for comparison (grey circles indicate other datasets for which the full dataset was available, white circles indicate datasets for which only summary statistics were available, see section 1 of the electronic supplementary material).

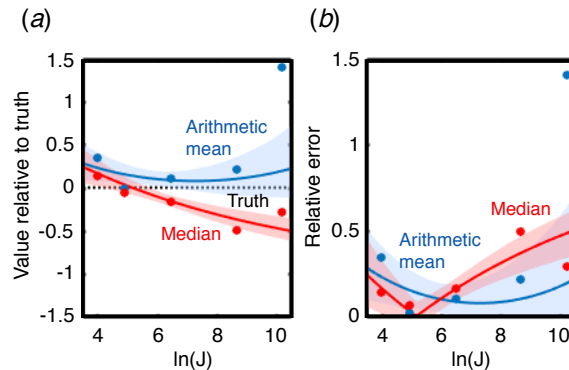

Figure 2: **The accuracy of the arithmetic mean and the median.** (a) The expected value of the arithmetic mean (blue) and median (red) relative to the true number of objects (black dotted line), as a function of  $\ln(J)$ . The relative value is defined as  $(X - J)/J$ , where  $X$  is the value of the aggregation measure. (b) The relative error of the expected value of the two aggregation measures, defined as  $|X - J|/J$ . For both panels, solid lines indicate maximum-likelihood values, shaded areas indicate 95% confidence intervals, and solid circles show the empirical values from the five datasets.

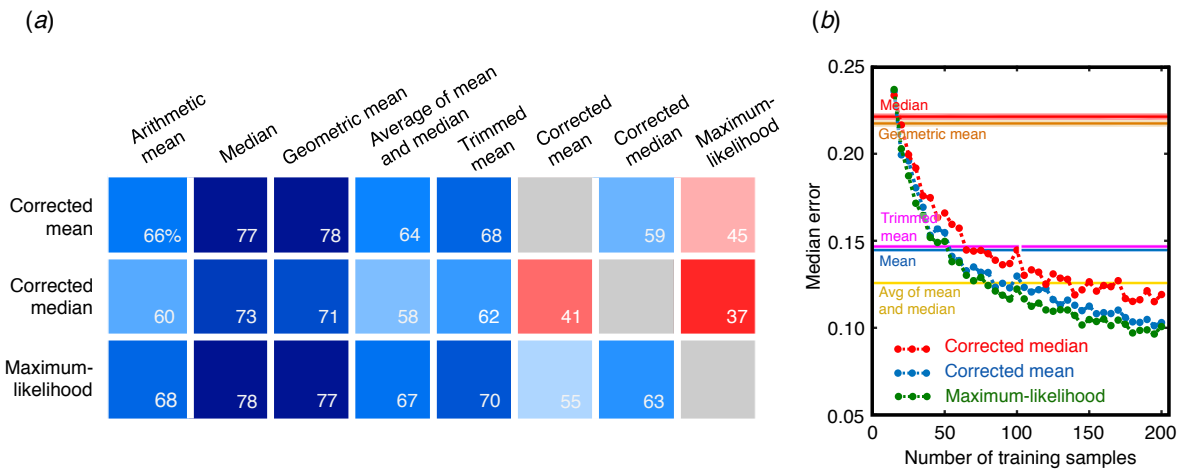

Figure 3: **The overall relative performance of the aggregation measures.** (a) The percentage of simulations in which the measure indicated in the row was more accurate than the measure indicated in the column. The three new measures are listed in the rows and are compared to all eight measures in the columns. Colors correlate with percentages (blue: >50%, red: <50%). (b) The median error of the three new aggregation measures (corrected median, dashed red line; corrected mean, dashed blue line; maximum-likelihood measure, dashed green line) as a function of the size of the training dataset. The three new aggregation measures are compared against the arithmetic mean (solid blue), median (solid red), the geometric mean (orange), the average of the mean and the median (yellow), and the trimmed mean (magenta). The 95% confidence interval are displayed for the latter measures, which are not a function of the size of the training dataset.

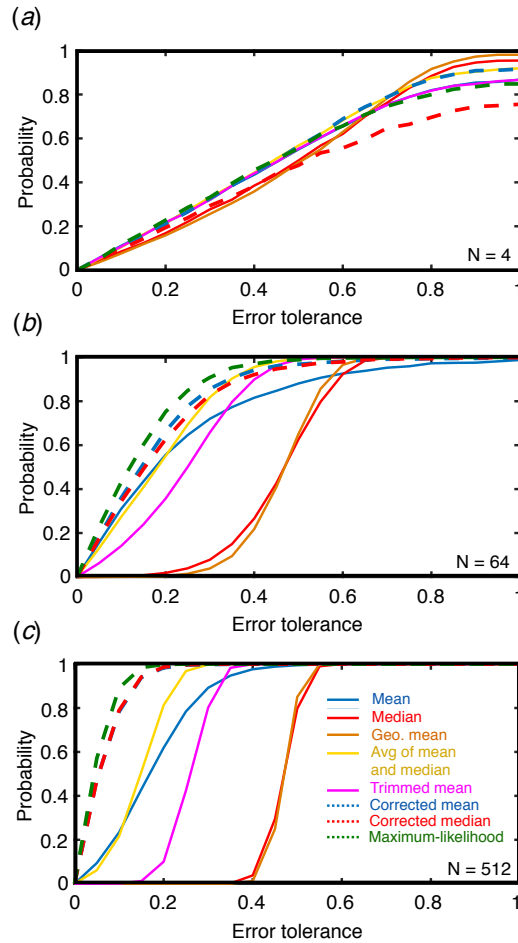

Figure 4: **The effect of the test dataset size and error tolerance level on the relative accuracy of the aggregation measures.** The probability that an aggregation measure exhibits a relative error (defined as  $|X - J|/J$ , where  $X$  is the value of an aggregation measure) less than a given error tolerance, for test dataset size (a) 4, (b) 64, and (c) 512, and numerosity  $J = 22026$  ( $\ln(J) = 10$ ). In panel (a), the lines for the arithmetic mean and the trimmed mean are nearly identical; in panel (c), the lines for the corrected mean and corrected median are nearly identical.

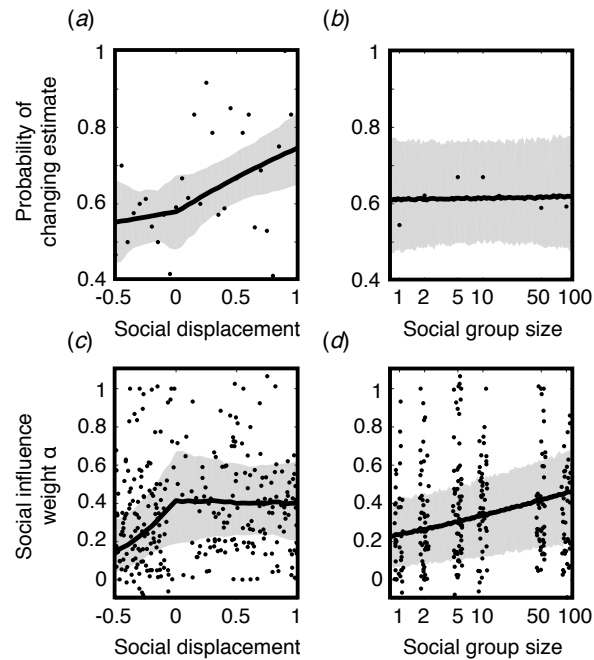

Figure 5: **The social influence rules.** The probability that an individual is affected by social information as a function of (a) social displacement (the relative displacement of the value of the social information from the participant's initial estimate) and (b) perceived social group size. The social influence weight  $\alpha$  for those who used social information as a function of (c) social displacement and (d) social group size. Solid lines: predicted mean value; shaded area: 95% credible interval; circles: the mean of binned data for (a-b) and raw data for (c-d). See Figure S11 for the posterior distributions of each predictor variable. We note that a small fraction of the empirical data extend outside of the bounds of the plots in (c-d); we selected the bounds to more clearly show the patterns of the fitted parameters.

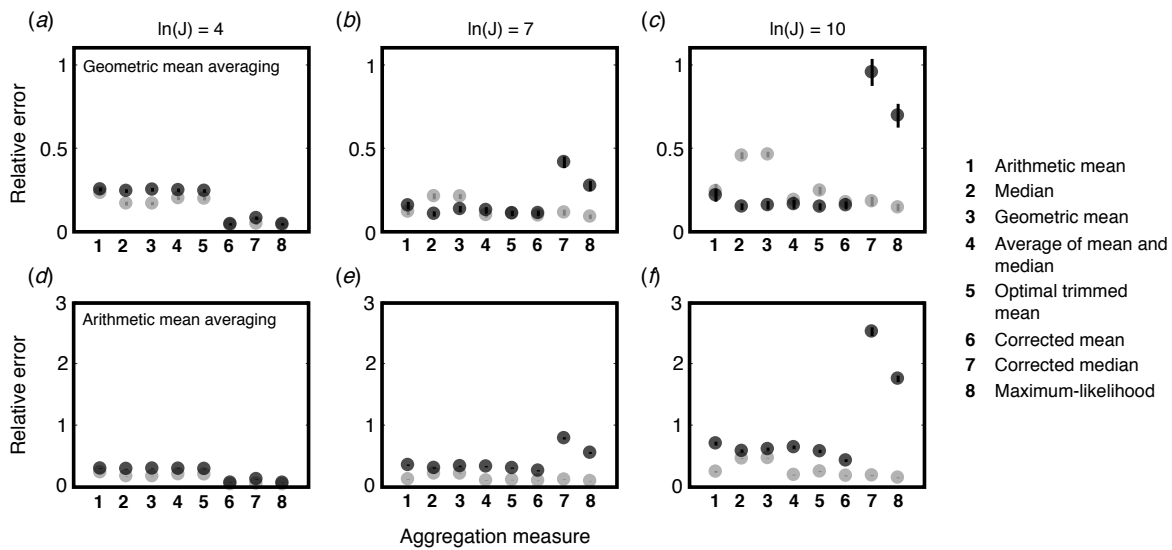

Figure 6: **The robustness of aggregation measures under social influence.** The relative error of the eight aggregation measures without social influence (light gray circles) and after ten rounds of social influence (dark gray circles) when (a-c) individuals internally take the geometric mean of the social information that they observe, or when (d-f) individuals internally take the arithmetic mean of the social information, for numerosity  $\ln(J) = 4$  (a,d),  $\ln(J) = 7$  (b,e), and  $\ln(J) = 10$  (c,f). Circles show the mean relative error across 1000 replicates, error bars show twice the standard error. The error bars are often smaller than the size of the corresponding circles, and where some gray circles are not visible, they are nearly identical to the corresponding black circles.
